# Supplementary material for: LIN28B Polymorphisms Influence Susceptibility to Epithelial Ovarian Cancer
Source: Oxford University Press journal article supplement (doi:10.1158/0008-5472.can-10-4167), 2011-04-12
Supplement: 00085472can104167-sup-supplementary_table_s4.pdf [file 00085472can104167-sup-supplementary_table_s4.pdf]

**Supplementary Table 4.** Findings from *in silico* Analysis of Risk-associated and Strongly Correlated SNPs

| Gene<br>(locus)  | Genotyped<br>SNP | #<br>SNPs<br>Tagged<br>* | Tagged<br>SNP(s) | Nucleotide<br>Position<br>(build 36) | Location       | Possible function<br>and/or conservation ** | r <sup>2</sup> between<br>significant<br>genotyped<br>SNPs                                                                     |                                                            |
|------------------|------------------|--------------------------|------------------|--------------------------------------|----------------|---------------------------------------------|--------------------------------------------------------------------------------------------------------------------------------|------------------------------------------------------------|
| AGO2<br>(8q24.3) | rs11996715       | 27                       | -                | 141716473                            | flanking 5'UTR | TFBS                                        | r <sup>2</sup> =0.30 between<br>rs11996715 and<br>rs2176397<br><br>r <sup>2</sup> =0.13 between<br>rs11996715 and<br>rs3864659 |                                                            |
|                  |                  |                          | rs10088475       | 141739448                            | intron (PTK2)  | intronic enhancer                           |                                                                                                                                |                                                            |
|                  |                  |                          | rs10089107       | 141767633                            | intron (PTK2)  | intronic enhancer                           |                                                                                                                                |                                                            |
|                  |                  |                          | rs10104479       | 141763253                            | intron (PTK2)  | intronic enhancer                           |                                                                                                                                |                                                            |
|                  |                  |                          | rs10107434       | 141741747                            | intron (PTK2)  | intronic enhancer                           |                                                                                                                                |                                                            |
|                  |                  |                          | rs10108814       | 141787496                            | intron (PTK2)  | no known function                           |                                                                                                                                |                                                            |
|                  |                  |                          | rs10282830       | 141740716                            | intron (PTK2)  | no known function                           |                                                                                                                                |                                                            |
|                  |                  |                          | rs10283164       | 141740811                            | intron (PTK2)  | no known function                           |                                                                                                                                |                                                            |
|                  |                  |                          | rs10283368       | 141748999                            | intron (PTK2)  | no known function                           |                                                                                                                                |                                                            |
|                  |                  |                          | rs10875457       | 141772777                            | intron (PTK2)  | no known function                           |                                                                                                                                |                                                            |
|                  |                  |                          | rs11166986       | 141725337                            | intron (PTK2)  | no known function                           |                                                                                                                                |                                                            |
|                  |                  |                          | rs11166990       | 141733154                            | intron (PTK2)  | no known function                           |                                                                                                                                |                                                            |
|                  |                  |                          | rs11166991       | 141735595                            | intron (PTK2)  | no known function                           |                                                                                                                                |                                                            |
|                  |                  |                          | rs11166992       | 141746652                            | intron (PTK2)  | no known function                           |                                                                                                                                |                                                            |
|                  |                  |                          | rs11776239       | 141787883                            | intron (PTK2)  | intronic enhancer                           |                                                                                                                                |                                                            |
|                  |                  |                          | rs11784281       | 141735192                            | intron (PTK2)  | no known function                           |                                                                                                                                |                                                            |
|                  |                  |                          | rs11995049       | 141762271                            | intron (PTK2)  | no known function                           |                                                                                                                                |                                                            |
|                  |                  |                          | rs11995103       | 141762443                            | intron (PTK2)  | no known function                           |                                                                                                                                |                                                            |
|                  |                  |                          | rs13264524       | 141723840                            | intron (PTK2)  | no known function                           |                                                                                                                                |                                                            |
|                  |                  |                          | rs13268978       | 141748567                            | intron (PTK2)  | no known function                           |                                                                                                                                |                                                            |
|                  |                  |                          | rs13273096       | 141745113                            | intron (PTK2)  | no known function                           |                                                                                                                                |                                                            |
|                  |                  |                          | rs13274713       | 141734379                            | intron (PTK2)  | no known function                           |                                                                                                                                |                                                            |
|                  |                  |                          | rs13275969       | 141742598                            | intron (PTK2)  | no known function                           |                                                                                                                                |                                                            |
|                  |                  |                          | rs4413752        | 141758154                            | intron (PTK2)  | no known function                           |                                                                                                                                |                                                            |
|                  |                  |                          | rs7460           | 141738042                            | 3'UTR (PTK2)   | MBS (miR-137,-335,-539); Conserved          |                                                                                                                                |                                                            |
|                  |                  |                          | rs7820179        | 141770658                            | intron (PTK2)  | no known function                           |                                                                                                                                |                                                            |
|                  | rs9324533        | 141761186                | intron (PTK2)    | intronic enhancer                    |                |                                             |                                                                                                                                |                                                            |
|                  | rs9644447        | 141761976                | intron (PTK2)    | no known function                    |                |                                             |                                                                                                                                |                                                            |
|                  |                  | rs2176397                | 2                | -                                    | 141691719      | intron                                      | no known function                                                                                                              | r <sup>2</sup> =0.03 between<br>rs2176397 and<br>rs3864659 |
|                  |                  |                          |                  | rs4961277                            | 141693901      | intron                                      | intronic enhancer                                                                                                              |                                                            |
|                  |                  |                          |                  | rs6995141                            | 141701149      | intron                                      | intronic enhancer                                                                                                              |                                                            |
|                  | rs3864659        | 4                        | -                | 141625044                            | intron         | no known function                           |                                                                                                                                |                                                            |
|                  |                  |                          | rs2944758        | 141638360                            | intron         | intronic enhancer                           |                                                                                                                                |                                                            |
|                  |                  |                          | rs2944762        | 141637401                            | intron         | intronic enhancer                           |                                                                                                                                |                                                            |

|                            |                   |   |                                                                                                                     |                                                                                                            |                                                                                                 |                                                                                                                                                                                                            |                                                                                                                                                              |
|----------------------------|-------------------|---|---------------------------------------------------------------------------------------------------------------------|------------------------------------------------------------------------------------------------------------|-------------------------------------------------------------------------------------------------|------------------------------------------------------------------------------------------------------------------------------------------------------------------------------------------------------------|--------------------------------------------------------------------------------------------------------------------------------------------------------------|
|                            |                   |   | rs2944767<br>rs2977485                                                                                              | 141627062<br>141635739                                                                                     | intron<br>intron                                                                                | intronic enhancer<br>intronic enhancer                                                                                                                                                                     |                                                                                                                                                              |
| <b>DCPI</b><br>(12p13.33)  | <b>rs10505725</b> | 0 | -                                                                                                                   | 94623895                                                                                                   | intron                                                                                          | no known function                                                                                                                                                                                          | $r^2=0.09$ between<br>rs10505725 and<br>rs2240610;<br>$r^2=0.11$ between<br>rs10505725 and<br>rs6489338;<br>$r^2=0.20$ between<br>rs10505725 and<br>rs725779 |
|                            | <b>rs2240610</b>  | 8 | -<br>rs1860048<br>rs2240611<br>rs2240612<br>rs2470425<br>rs2470427<br>rs2470448<br>rs4765874<br>rs7966355<br>rs7222 | 1927853<br>1928956<br>1927962<br>1928506<br>1948158<br>1946245<br>1937696<br>1993943<br>1945913<br>1925527 | intron<br>intron<br>intron<br>intron<br>intron<br>intron<br>intron<br>intron<br>intron<br>3'UTR | intronic enhancer<br>no known function<br>no known function<br>splice site<br>intronic enhancer<br>no known function<br>no known function<br>intronic enhancer<br>no known function<br>MBS (miR-32, -1279) | $r^2=0.93$ between<br>rs2240610 and<br>rs6489338                                                                                                             |
|                            | <b>rs6489338</b>  | 5 | -<br>rs2470425<br>rs2470427<br>rs2470448<br>rs4765874<br>rs7966355                                                  | 1930841<br>1948158<br>1946245<br>1937696<br>1993943<br>1945913                                             | intron<br>intron<br>intron<br>intron<br>intron<br>intron                                        | intronic enhancer<br>intronic enhancer<br>no known function<br>no known function<br>intronic enhancer<br>no known function                                                                                 |                                                                                                                                                              |
| <b>DICER</b><br>(14q32.13) | <b>rs1057035</b>  | 0 | -                                                                                                                   | 94623895                                                                                                   | 3'UTR                                                                                           | MBS (miR 574-3p); ESE                                                                                                                                                                                      |                                                                                                                                                              |
|                            | <b>rs1110386</b>  | 0 | -                                                                                                                   | 94623895                                                                                                   | flanking 3'UTR                                                                                  | no known function                                                                                                                                                                                          | $r^2=0.10$ between<br>rs1110386 and<br>rs11621737<br><br>$r^2=0.16$ between<br>rs1110386 and<br>rs2353726                                                    |

|                                         |                   |   |                                                         |                                                          |                                                    |                                                                                                       |                                                                                                                                                      |
|-----------------------------------------|-------------------|---|---------------------------------------------------------|----------------------------------------------------------|----------------------------------------------------|-------------------------------------------------------------------------------------------------------|------------------------------------------------------------------------------------------------------------------------------------------------------|
|                                         | <b>rs11621737</b> | 1 | -<br>rs11625422                                         | 94592587<br>94595367                                     | flanking 3'UTR<br>flanking 3'UTR                   | no known function<br>no known function; conserved                                                     | $r^2=0.38$ between<br>rs11621737 and<br>rs2353726                                                                                                    |
|                                         | <b>rs2353726</b>  | 4 | -<br>rs11622458<br>rs11622522<br>rs7160684<br>rs8022945 | 94604622<br>94605251<br>94605456<br>94607134<br>94606883 | flanking 3'UTR                                     | no known function<br>no known function<br>no known function<br>no known function<br>no known function |                                                                                                                                                      |
| <b><i>DROSHA</i></b><br><b>(5p13.3)</b> | <b>rs10067066</b> | 0 | -                                                       | 31482473                                                 | intron                                             | intronic enhancer                                                                                     | $r^2=0.006$<br>between<br>rs10067066 and<br>rs13186629,<br>rs17404622, and<br>rs2161006<br><br>$r^2=0.002$<br>between<br>rs10067066 and<br>rs6450839 |
|                                         | <b>rs13186629</b> | 2 | -<br>rs17404622<br>rs2161006                            | 31411810<br>31417087<br>31417271                         | flanking 3'UTR<br>flanking 3'UTR<br>flanking 3'UTR | no known function<br>no known function<br>no known function                                           | $r^2=0.93$ between<br>rs13186629,<br>rs17404622, and<br>rs2161006<br><br>$r^2=0.244$<br>between<br>rs13186629 and<br>rs6450839                       |
|                                         | <b>rs6450839</b>  | 0 | -                                                       | 31419659                                                 | flanking 3'UTR                                     | no known function                                                                                     |                                                                                                                                                      |
| <b><i>FMRI</i></b><br><b>(Xq27.3)</b>   | <b>rs25704</b>    | 0 | -                                                       | 146839230                                                | 3'UTR                                              | MBS (miR 548b-5p, miR-382)                                                                            |                                                                                                                                                      |

|                                      |                   |   |                 |                        |                          |                                      |                                                                                                                                                                       |
|--------------------------------------|-------------------|---|-----------------|------------------------|--------------------------|--------------------------------------|-----------------------------------------------------------------------------------------------------------------------------------------------------------------------|
| <b>LIN28</b><br><b>(1p36.11)</b>     | <b>rs11247946</b> | 0 | -               | 26591702               | flanking 5'UTR           | no known function                    | $r^2=0.17$ between<br>rs11247946 and<br>rs12728900<br><br>$r^2=0.12$ between<br>rs11247946 and<br>rs11581746<br><br>$r^2=0.61$ between<br>rs11247946 and<br>rs6598964 |
|                                      | <b>rs11581746</b> | 0 | -               | 26616674               | Intron                   | no known function                    | $r^2=0.60$ between<br>rs11581746 and<br>rs12728900                                                                                                                    |
|                                      | <b>rs12728900</b> | 0 | -               | 26619394               | intron                   | intronic enhancer                    | $r^2=0.28$ between<br>rs12728900 and<br>rs6598964                                                                                                                     |
|                                      | <b>rs6598964</b>  | 0 | -               | 26618914               | intron                   | no known function                    |                                                                                                                                                                       |
| <b>LIN28B</b><br><b>(6q16.3-q21)</b> | <b>rs12194974</b> | 1 | -<br>rs12212292 | 105510891<br>105533637 | flanking 5'UTR<br>intron | TFBS; Conserved<br>intronic enhancer | $r^2=0.02$ between<br>rs12194974 and<br>rs17065417                                                                                                                    |
|                                      | <b>rs17065417</b> | 1 | -<br>rs1149280  | 105512967<br>105561492 | intron<br>intron         | TFBS<br>no known function            | $r^2=0.07$ between<br>rs17065417 and<br>rs314263                                                                                                                      |
| <b>PACT</b><br><b>(2q31.2)</b>       | <b>rs2059691</b>  | 0 | -               | 179010130              | intron                   | no known function                    | -                                                                                                                                                                     |
| <b>SMAD4</b><br><b>(18q21.1)</b>     | <b>rs948588</b>   | 1 | -<br>rs17663887 | 46840342<br>46843716   | intron                   | no known function                    | -                                                                                                                                                                     |

Abbreviations: TFBS=transcription factor binding site; UTR=untranslated region; MBS=microRNA binding site; miR= miRNA; EXE=exon splicing enhancer

Note: SNPinfo <http://snpinfo.niehs.nih.gov/> and FastSNP [http://fastsnp.ibms.sinica.edu.tw/pages/input\\_SNPListAnalysis.jsp/](http://fastsnp.ibms.sinica.edu.tw/pages/input_SNPListAnalysis.jsp/) were used for *in silico* predictions of risk-associated SNPs (Table 2) and their tagSNPs.

\* TagSNPs defined as  $r^2 > 0.80$  and within 250kb of genotyped SNP using HapMap2 data (<http://hapmap.ncbi.nlm.nih.gov/>).

\*\*Based on Vertebrate Multi-Alignment and Conservation Score (17 species) downloaded from the UCSC genome bioinformatics web site (<http://genome.ucsc.edu/>) and obtained through SNPInfo (<http://snpinfo.niehs.nih.gov/>).
